# Supplementary material
Source: MDPI journal article supplement (https://www.mdpi.com/2073-4352/13/3/442)
Supplement: s1 [file s1]

Archive with 2 entries (2 files):
- Supplementary information-Two-dimensional carbon networks with negative Poisson 's ratio-V11-20230303.pdf
- Zigzag-Chain.mp4
